# Supplementary material for: Genome-Wide Identification and Expression Analysis of CesA Gene Family in Corymbia citriodora
Source: MDPI journal article supplement (doi:10.3390/f14030618), 2023-03-20
Supplement: s1 [file s1]

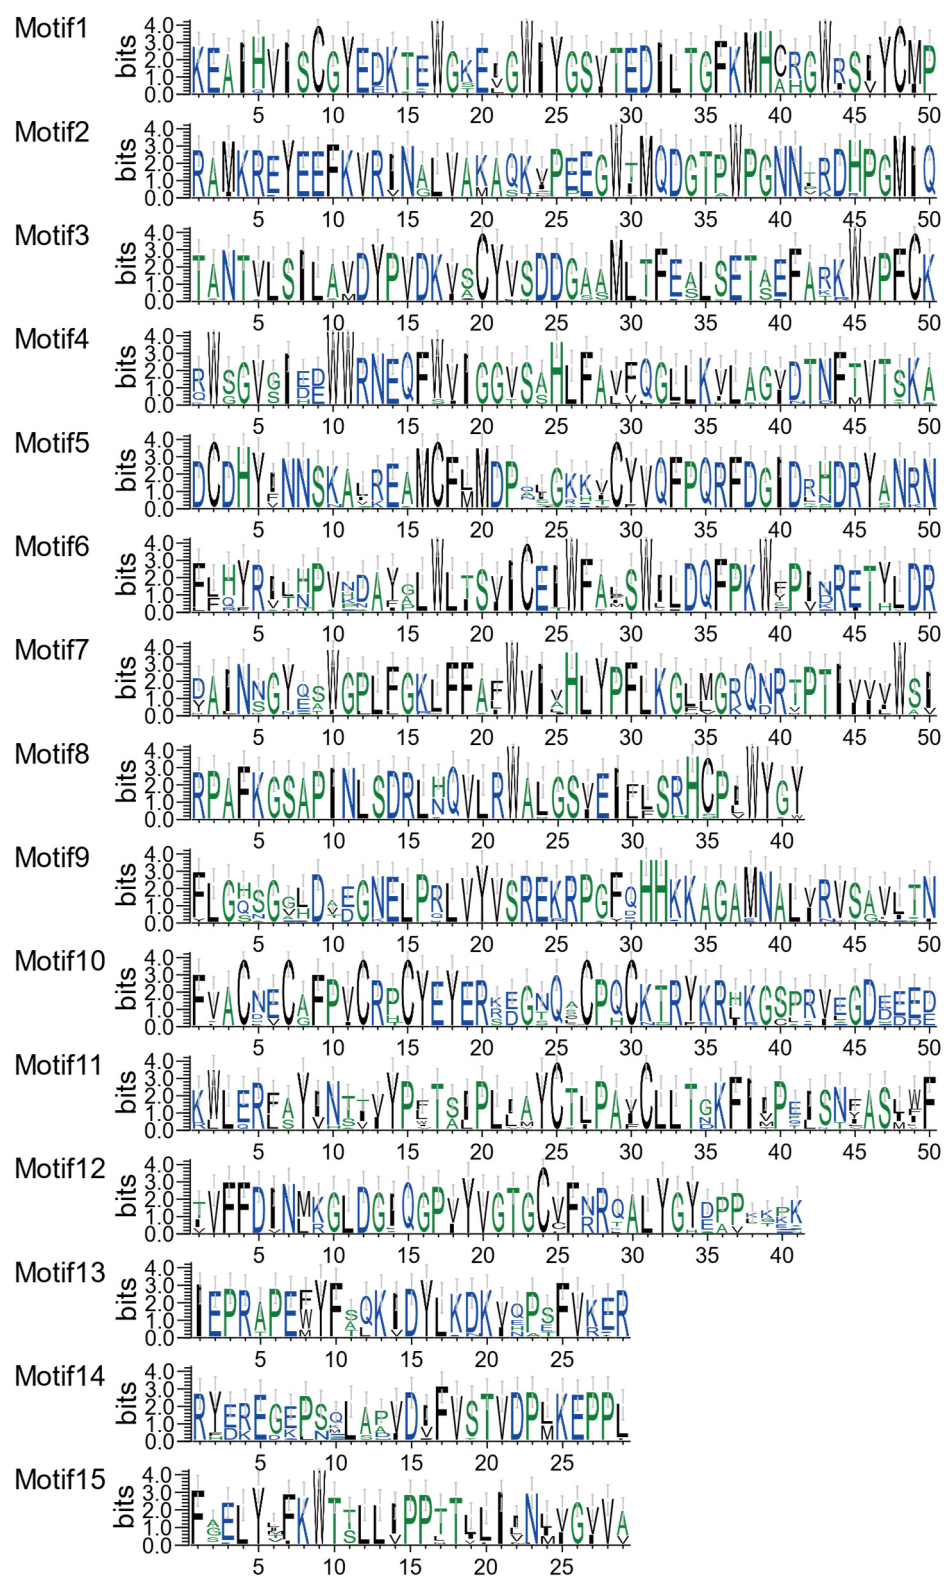

**Figure S1. Motif sequences identified in CcCesA proteins of *C. citriodora*.** The height of different amino acids represents repeatability. The scale bar at the bottom indicates the length of the motif protein sequence.

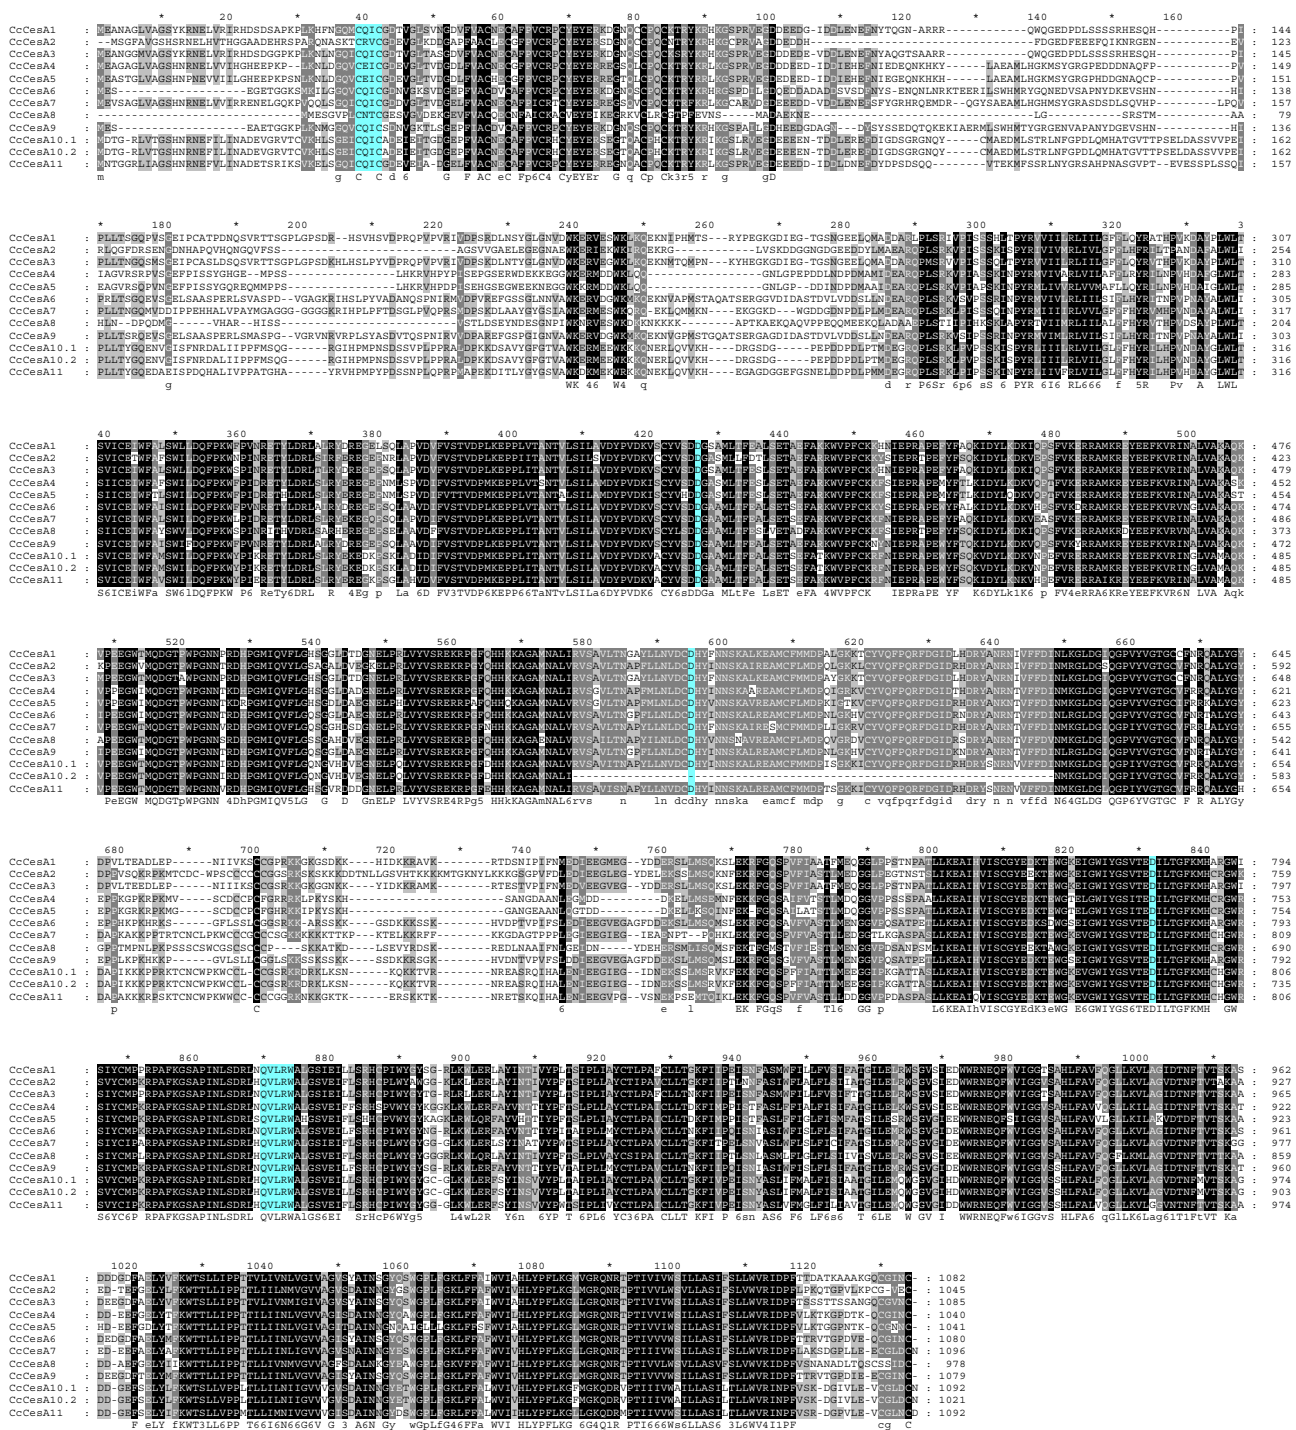

**Figure S2. Alignments of the deduced amino acid sequences of CcCesAs in *C. citriodora*.** The three aspartate (D) residues, the QxxRW motif and CxxC motif that are critical for the function of Cesa (see text) are marked by the shade of cyan.
